# Supplementary material for: Coseismic Rupture Model and Tectonic Implications of the January 7 2022, Menyuan Mw 6.6 Earthquake Constraints from InSAR Observations and Field Investigation
Source: MDPI journal article supplement (doi:10.3390/rs14092111), 2022-04-28
Supplement: s1 [file s1]

Supporting Information for

**Coseismic rupture model and tectonic implications of January 7, 2022, Menyuan Mw 6.6 earthquake constraints from InSAR observation and field investigation**

**Yongsheng Li<sup>1</sup>, Wenliang Jiang<sup>1</sup>, Yujiang Li<sup>1\*</sup>, Wenhao Shen<sup>1</sup>, Zhongtai He<sup>1</sup>,  
Bingquan Li<sup>2</sup>, Qiang Li<sup>1</sup>, Qisong Jiao<sup>1</sup> and Yunfeng Tian<sup>1</sup>**

<sup>1</sup> National Institute of Natural Hazards, Ministry of Emergency Management of China

<sup>2</sup> School of Automation, China University of Geoscience, Wuhan, 430074, China

\*Correspondence: yujiangli@ninhm.ac.cn

## **Introduction**

In the supporting information, we present correction of the tropospheric delay errors and terrain-correlated atmospheric phase delay (TCAD) (Fig. S1), the orbit errors correction for descending track 33 and ascending tracking 128 (Fig. S2), the long wavelength phase errors correction for the pixel offset tracking in range direction (Fig. S3), the uncertainties and trade-offs for the nonlinear inversion computed using Monte Carlo analysis (Fig. S4). The Tab. S1 present the focal mechanisms and rupture parameters from different studies, Tab. S2 shows the Sentinel-1 TOPS mode data used in this paper and Tab. S3 shows the parameters in the stratified viscoelastic Burgers model in this paper.

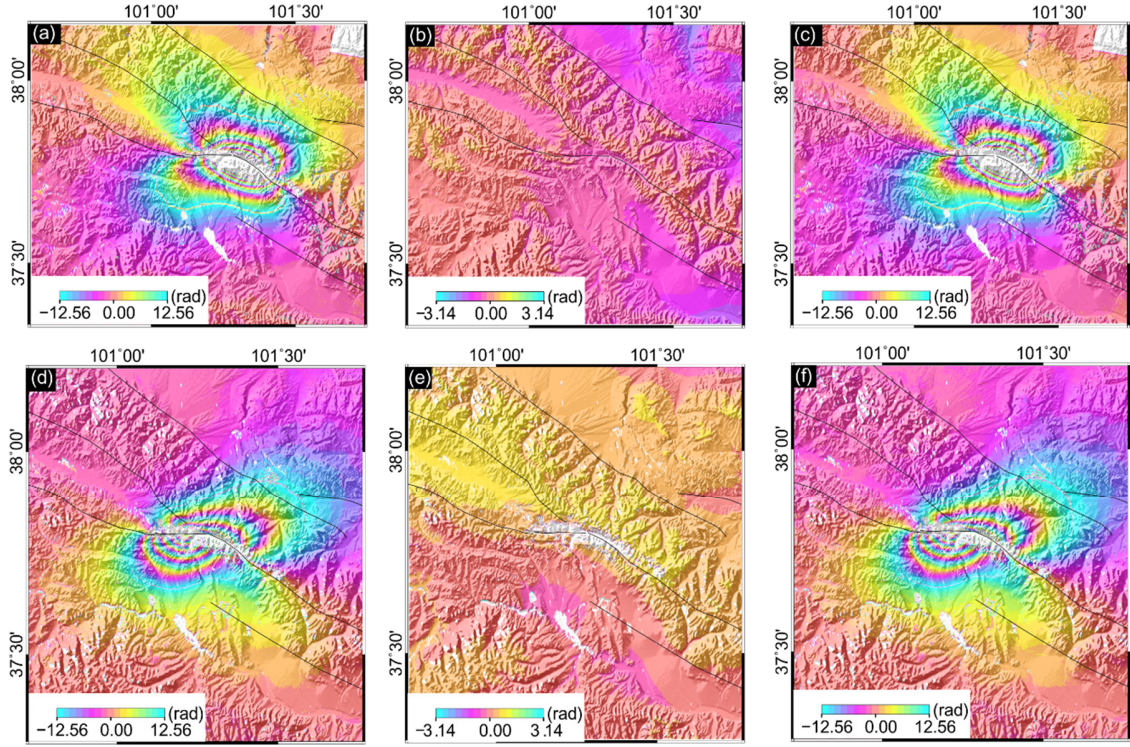

**Figure S1.** Correction for the tropospheric delay errors and terrain-correlated atmospheric phase delay (TCAD), the external atmospheric delay product from Generic Atmospheric Correction Online Service for InSAR (GACOS). (a) is the original unwrapped coseismic interferogram from Sentinel-1 descending track 33. (b) Modelled atmospheric phase delay for (a) from GACOS method. (c) Corrected interferogram after subtracting (b) from (a). (d) is the original unwrapped coseismic interferogram from Sentinel-1 ascending track 128. (e) Modelled atmospheric phase delay for (d) from GACOS method. (f) Corrected interferogram after subtracting (e) from (d).

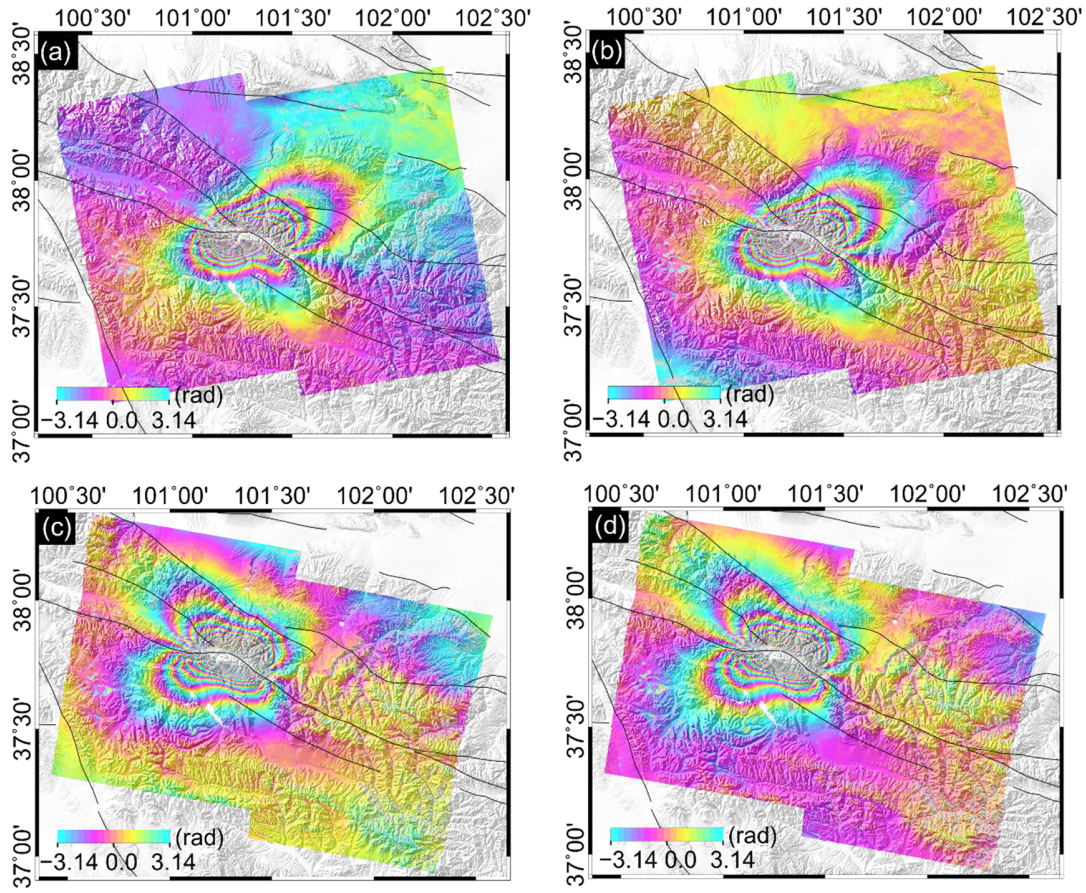

**Figure S2.** The orbit errors correction for descending track 33 and ascending tracking 128. (a) the original unwrapped coseismic interferogram of descending track 33. (b) the unwrapped interferogram after subtracting a first-order spatial non-deformed long-wavelength phase ramp from (a). (c) the original unwrapped coseismic interferogram of ascending track 128. (d) the unwrapped interferogram after subtracting a first-order spatial non-deformed long-wavelength phase ramp from (c).



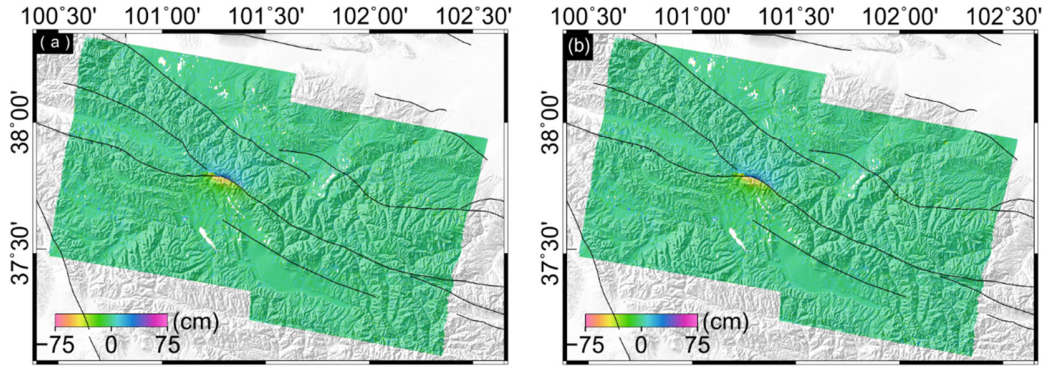

**Figure S3.** The long wavelength phase errors correction for the pixel offset tracking in range direction. (a) the original range offset tracking map of descending track 33. (b) the corrected range offset tracking map by subtracting the estimated first-order phase ramp.



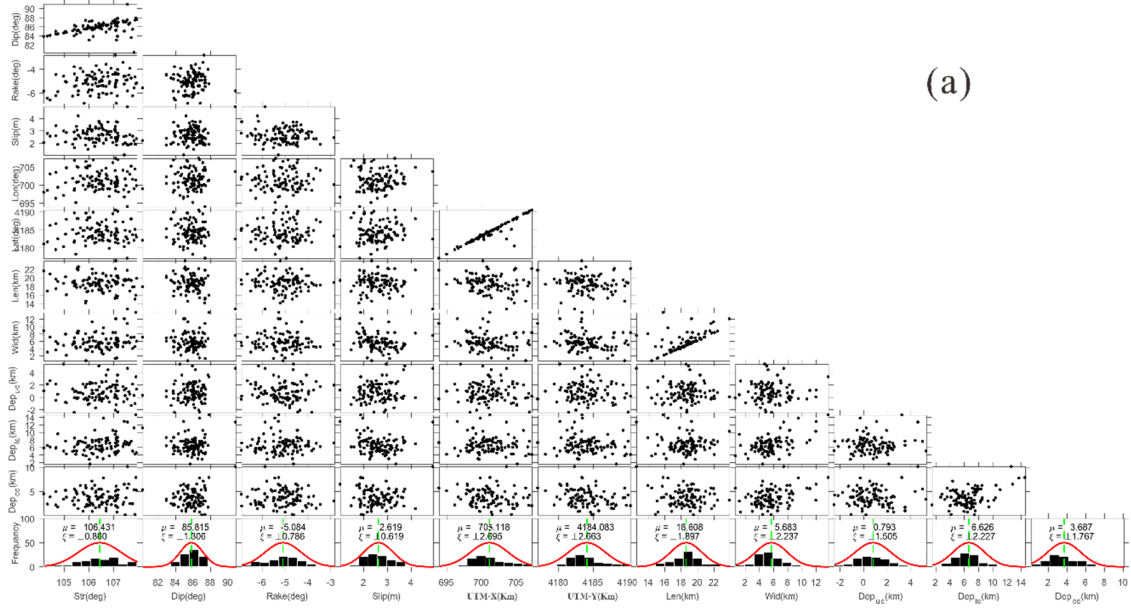

(a)

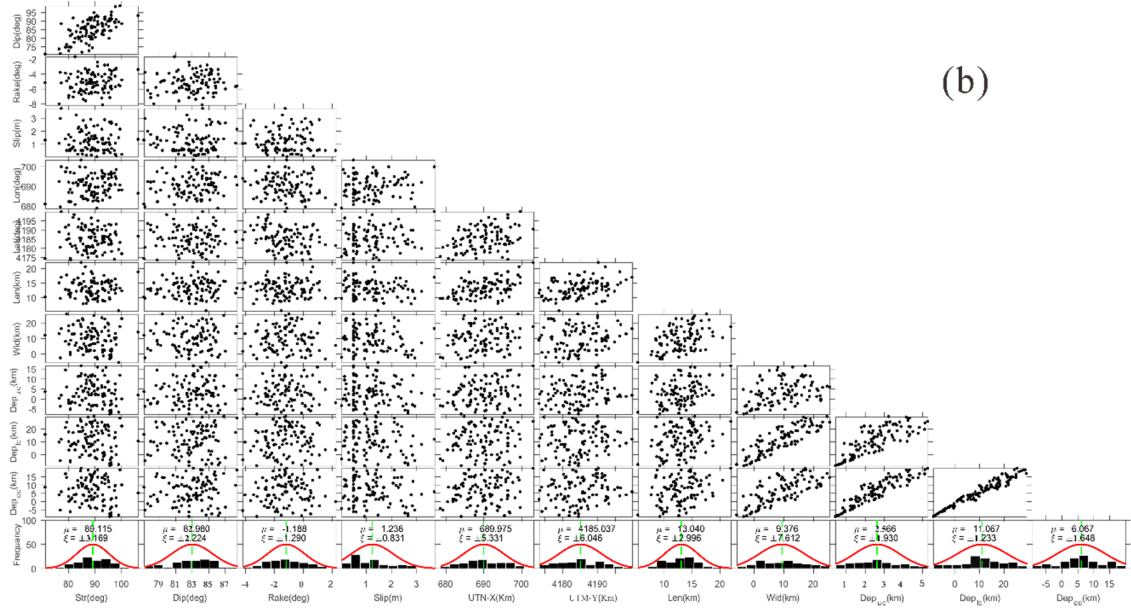

(b)

**Figure S4.** Uncertainties and trade-offs for the nonlinear inversion computed using Monte Carlo analysis. (a) the Monte Carlo analysis for F1. (b) Monte Carlo analysis for F2.

**Table S1.** Focal mechanisms and rupture parameters from different studies.

| Source             | Lon       | Lat      | Focal mechanism                     | Depth(km) | Mag. (Mw) |
|--------------------|-----------|----------|-------------------------------------|-----------|-----------|
| IPGP               | 101.275°E | 37.811°N | 284°/89°/-2°                        | 15.0      | 6.68      |
| USGS               | 101.278°E | 37.815°N | 104°/88°/15°                        | 11.5      | 6.61      |
| GCMT               | 101.31°E  | 37.80°N  | 104°/82°/1°                         | 14.8      | 6.7       |
| GFZ                | 101.34°E  | 37.81°N  | 285°/82°/16°                        | 10.0      | 6.6       |
| IG, CEA            | 101.26°E  | 37.77°N  | 109°/81°/39°                        | 4.0       | 6.6       |
| Li et al., 2022    | -         | -        | F1: 104°/80°/0°<br>F2: 109°/80°/5°  | 5.0       | 6.7       |
| InSAR (This study) | 101.28°E  | 37.812°N | F1: 106°/86°/-5°<br>F2: 89°/83°/-1° | 4.0       | 6.6       |

**Table S2.** SAR images used in the InSAR analysis

| Track | Direction | Master   | Slave    | Spat. baseline | Inc. angle |
|-------|-----------|----------|----------|----------------|------------|
| 26    | ASC       | 20211229 | 20220110 | 107            | 45         |
| 33    | DSC       | 20211229 | 20220110 | 55             | 38         |
| 128   | ASC       | 20220105 | 20220117 | 39             | 36         |

**Table S3.** Parameters in the stratified viscoelastic Burgers model

| Layer        | Thickness/km | $V_p/\text{km}\cdot\text{s}^{-1}$ | $V_s/\text{km}\cdot\text{s}^{-1}$ | $\rho/\text{kg}\cdot\text{m}^{-3}$ | $\eta_1/\text{Pa}\cdot\text{s}$ | $\eta_2/\text{Pa}\cdot\text{s}$ |
|--------------|--------------|-----------------------------------|-----------------------------------|------------------------------------|---------------------------------|---------------------------------|
| Upper crust  | 10           | 5.90                              | 3.41                              | 2500                               | —                               |                                 |
|              | 10           | 6.18                              | 3.57                              | 2700                               |                                 |                                 |
| Middle crust | 12           | 5.85                              | 3.38                              | 2600                               | $9.0\times 10^{18}$             | $1.0\times 10^{19}$             |
| Lower crust  | 10           | 6.40                              | 3.59                              | 3000                               | $9.0\times 10^{18}$             | $1.0\times 10^{19}$             |
|              | 20           | 6.80                              | 3.70                              | 3100                               | $9.0\times 10^{18}$             | $1.0\times 10^{19}$             |
| Upper mantle |              | 8.10                              | 3.89                              | 3350                               | 0                               | $1.0\times 10^{20}$             |

$V_p$ : P wave velocity,  $V_s$ : S wave velocity,  $\rho$ : density,  $\eta_1$ : transient viscosity coefficients, and  $\eta_2$ : steady-state viscosity coefficients.
